# Supplementary material for: Virulent secondary metabolites of entomopathogenic bacteria genera, Xenorhabdus and Photorhabdus, inhibit phospholipase A2 to suppress host insect immunity
Source: PubMed Central journal article supplement (PMC7684946; doi:10.1186/s12866-020-02042-9), 2020-11-23
Supplement: 12866_2020_2042_MOESM1_ESM.pdf [file 12866_2020_2042_MOESM1_ESM.pdf]

## Supplementary data

**Table S1.** Insecticidal activities of four organic extracts of culture broth of 14 entomopathogenic bacteria (EPB) of *Xenorhabdus* and *Photorhabdus* against L5 larvae of *S. exigua*. The bioassay was carried out by injecting 3  $\mu$ L of bacterial culture broth extracts from different concentrations into the hemocoel of L5 larva. Each treatment dose used 10 larvae and each treatment replicated three times.

**Table S2.** GC-MS prediction of secondary metabolites in organic extracts of bacterial culture broth from 14 species of *Xenorhabdus* and *Photorhabdus*.

**Table S3.** Secondary metabolites predicted from *Photorhabdus temperata temperata* (Ptt), *Xenorhabdus hominickii* (Xh) and *Xenorhabdus ehlersii* (Xe) which were used for biological activity analysis.

**Fig. S1.** Chromatograms from the GC-MS analysis of the organic extracts of 14 bacterial culture broths for the prediction of bacterial metabolites. Four organic solvents such as hexane, ethyl acetate, chloroform and butanol were used to get organic extracts ‘HEX’, ‘EAX’, ‘CX’ and ‘BX’ from the bacteria, *Photorhabdus temperata* subsp. *temperata* ANU101 (‘Ptt’), *Xenorhabdus hominickii* ANU101 (‘Xh’), *X. nematophila* K1 (‘XnK1’), *X. ehlersii* KSY (‘Xe’), *X. nematophila* SK1 (‘XnSK1’), *X. nematophila* SK2 (‘XnSK2’), *Photorhabdus luminescens* KACC12123 (‘Pl 193’), *P. luminescens* subsp. *laumondii* KACC12283 (‘Pl laum’), *P. luminescens* subsp.

*thracensis* KACC12284 ('Pl thra'), *X. nematophila* KACC12145 ('Xn12145'), *X. nematophila* Mexico ('XnM'), *X. nematophila* France ('XnF'), *X. bovienii* ('Xb'), and *X. poinarii* ('Xp'). The extracts were dried using rotary evaporator and the resulting product was dissolved in methanol. After filtration, the sample was used for GC analysis and MS recording. NIST 11 database were used to predict compounds based on mass spectra. X axis indicates the retention time in min.

**Table S1.** Insecticidal activities of four organic extracts of culture broth of 14 entomopathogenic bacteria (EPB) of *Xenorhabdus* and *Photorhabdus* against L5 larvae of *S. exigua*. The bioassay was carried out by injecting 3  $\mu$ L of bacterial culture broth extracts from different concentrations into the hemocoel of L5 larva. Each treatment dose used 10 larvae and each treatment replicated three times.

| EPB <sup>1</sup> | Organic <sup>2</sup><br>extracts | LD <sub>50</sub> ( $\mu$ g/larva)<br>(95 % CI) | Slope $\pm$ SE  | df | $\chi^2$ |
|------------------|----------------------------------|------------------------------------------------|-----------------|----|----------|
| Xn SK1           | HEX                              | 720.95 (355.7-1431.2)                          | 0.30 $\pm$ 0.67 | 3  | 0.821    |
|                  | EAX                              | 399.45 (204.8-789.3)                           | 0.35 $\pm$ 0.55 | 3  | 0.933    |
|                  | CX                               | 563.42 (290.3-1107.8)                          | 0.33 $\pm$ 0.61 | 3  | 0.902    |
|                  | BX                               | 516.72 (253.8-1029.5)                          | 0.42 $\pm$ 0.49 | 3  | 0.713    |
| Xn SK2           | HEX                              | 432.42 (218.3-851.5)                           | 0.35 $\pm$ 0.52 | 3  | 0.537    |
|                  | EAX                              | 205.59 (106.8-407.5)                           | 0.42 $\pm$ 0.48 | 3  | 0.728    |
|                  | CX                               | 310.47 (157.9-608.9)                           | 0.34 $\pm$ 0.58 | 3  | 0.899    |
|                  | BX                               | 248.91 (132.4-486.8)                           | 0.39 $\pm$ 0.52 | 3  | 0.666    |
| Xn M             | HEX                              | 305.57 (157.3-611.7)                           | 0.33 $\pm$ 0.62 | 3  | 0.527    |
|                  | EAX                              | 259.14 (126.3-505.3)                           | 0.38 $\pm$ 0.53 | 3  | 0.552    |
|                  | CX                               | 268.93 (132.6-522.8)                           | 0.35 $\pm$ 0.59 | 3  | 0.554    |
|                  | BX                               | 228.91 (112.8-445.8)                           | 0.41 $\pm$ 0.52 | 3  | 0.666    |
| Xn F             | HEX                              | 278.78 (136.1-536.3)                           | 0.33 $\pm$ 0.62 | 3  | 0.491    |
|                  | EAX                              | 184.31 (91.8-365.4)                            | 0.43 $\pm$ 0.47 | 3  | 0.649    |
|                  | CX                               | 281.46 (140.3-563.2)                           | 0.38 $\pm$ 0.54 | 3  | 0.526    |
|                  | BX                               | 195.58 (186.2-384.9)                           | 0.41 $\pm$ 0.48 | 3  | 0.610    |
| Xn 12145         | HEX                              | 522.41 (260.3-1021.3)                          | 0.35 $\pm$ 0.58 | 3  | 0.537    |
|                  | EAX                              | 372.19 (184.9-742.7)                           | 0.38 $\pm$ 0.54 | 3  | 0.61     |
|                  | CX                               | 495.45 (252.7-969.8)                           | 0.37 $\pm$ 0.56 | 3  | 0.592    |
|                  | BX                               | 383.88 (190.6-774.6)                           | 0.37 $\pm$ 0.54 | 3  | 0.691    |
| Xn K1            | HEX                              | 665.87 (332.8-1323.3)                          | 0.35 $\pm$ 0.58 | 3  | 0.635    |
|                  | EAX                              | 492.56 (245.2-983.7)                           | 0.39 $\pm$ 0.53 | 3  | 0.732    |
|                  | CX                               | 617.69 (306.9-1221.6)                          | 0.37 $\pm$ 0.55 | 3  | 0.688    |
|                  | BX                               | 512.57 (254.7-1018.7)                          | 0.39 $\pm$ 0.53 | 3  | 0.732    |
| Xb               | HEX                              | 199.06 (101.1-401.2)                           | 0.38 $\pm$ 0.54 | 3  | 0.862    |
|                  | EAX                              | 154.31 (77.9-302.5)                            | 0.42 $\pm$ 0.47 | 3  | 0.649    |
|                  | CX                               | 203.77 (102.3-405.7)                           | 0.42 $\pm$ 0.52 | 3  | 0.899    |
|                  | BX                               | 167.78 (85.3-332.4)                            | 0.43 $\pm$ 0.48 | 3  | 0.937    |
| Xe               | HEX                              | 787.58 (395.5-1572.1)                          | 0.32 $\pm$ 0.64 | 3  | 0.952    |
|                  | EAX                              | 422.29 (214.5-841.8)                           | 0.34 $\pm$ 0.59 | 3  | 0.988    |
|                  | CX                               | 629.09 (317.3-1254.2)                          | 0.32 $\pm$ 0.63 | 3  | 0.942    |
|                  | BX                               | 584.94 (299.5-1162.9)                          | 0.34 $\pm$ 0.52 | 3  | 0.963    |
| Xh               | HEX                              | 219.32 (112.4-436.2)                           | 0.33 $\pm$ 0.65 | 3  | 0.649    |
|                  | EAX                              | 132.24 (74.3-261.7)                            | 0.37 $\pm$ 0.52 | 3  | 0.993    |
|                  | CX                               | 189.79 (98.6-367.4)                            | 0.28 $\pm$ 0.68 | 3  | 0.971    |
|                  | BX                               | 92.44 (53.9-179.8)                             | 0.33 $\pm$ 0.57 | 3  | 0.997    |
| Xp               | HEX                              | 770.77 (387.2-1497.5)                          | 0.28 $\pm$ 0.74 | 3  | 0.993    |
|                  | EAX                              | 483.92 (242.5-965.8)                           | 0.29 $\pm$ 0.69 | 3  | 0.917    |
|                  | CX                               | 677.98 (341.61354.2)                           | 0.29 $\pm$ 0.42 | 3  | 0.786    |
|                  | BX                               | 438.06 (221.7-875.1)                           | 0.31 $\pm$ 0.56 | 3  | 0.929    |
| Ptt              | HEX                              | 178.59 (95.3-376.2)                            | 0.36 $\pm$ 0.56 | 3  | 0.967    |
|                  | EAX                              | 111.75 (57.1-120.9)                            | 0.34 $\pm$ 0.61 | 3  | 0.945    |

|         |     |                       |                  |   |       |
|---------|-----|-----------------------|------------------|---|-------|
|         | CX  | 167.21 (85.9-333.8)   | $0.32 \pm 0.62$  | 3 | 0.893 |
|         | BX  | 126.89 (65.4-245.5)   | $0.303 \pm 0.66$ | 3 | 0.961 |
| Pl 193  | HEX | 350.37 (180.2-697.3)  | $0.32 \pm 0.62$  | 3 | 0.952 |
|         | EAX | 209.94 (56.1-416.9)   | $0.31 \pm 0.62$  | 3 | 0.982 |
|         | CX  | 312.56 (158.5-621.4)  | $0.34 \pm 0.59$  | 3 | 0.932 |
|         | BX  | 242.99 (124.9-480.6)  | $0.32 \pm 0.62$  | 3 | 0.984 |
| Pl laum | HEX | 381.08 (190.7-754.9)  | $0.29 \pm 0.71$  | 3 | 0.931 |
|         | EAX | 207.96 (106.7-412.8)  | $0.31 \pm 0.62$  | 3 | 0.985 |
|         | CX  | 301.41 (153.2-600.3)  | $0.30 \pm 0.66$  | 3 | 0.930 |
|         | BX  | 180.47 (93.5-357.8)   | $0.34 \pm 0.58$  | 3 | 0.897 |
| Pl thra | HEX | 536.96 (266.5-1067.4) | $0.30 \pm 0.66$  | 3 | 0.961 |
|         | EAX | 211.59 (109.2-413.7)  | $0.33 \pm 0.59$  | 3 | 0.883 |
|         | CX  | 314.34 (158.9-625.6)  | $0.38 \pm 0.53$  | 3 | 0.778 |
|         | BX  | 170.82 (88.4-336.2)   | $0.35 \pm 0.58$  | 3 | 0.972 |

<sup>1</sup> Entomopathogenic bacteria (EPB) acronyms are mentioned in Materials and Methods.

<sup>2</sup> Organic extract acronyms are: hexane extracts ('HEX'), ethyl acetate extracts ('EAX'), chloroform extract ('CX') and butanol extract ('BX').

**Table S2.** GC-MS prediction of secondary metabolites in organic extracts of bacterial culture broth from 14 bacterial isolates of *Xenorhabdus* and *Photorhabdus*.

| RT <sup>1</sup> | Compound <sup>2</sup>                                            | Xn SK1 | Xn SK2 | Xn M <sup>3</sup> | Xn F | Xn | Xn KI | Xb | Xe | Xh | Xp | Ptt | PI 193 | PI | PI thra |
|-----------------|------------------------------------------------------------------|--------|--------|-------------------|------|----|-------|----|----|----|----|-----|--------|----|---------|
| 2.246           | Ethanol, 2,2-diethoxy-                                           |        | +      |                   |      |    |       |    |    |    |    |     |        |    |         |
| 2.4             | 4-Ethylamino-n-butylamine                                        |        |        |                   |      |    |       |    |    |    |    | +   |        |    |         |
| 2.453           | 1-Butanamine, N-butyl-                                           | +      |        | +                 | +    | +  | +     | +  |    | +  |    | +   | +      | +  | +       |
| 2.471           | Leucine                                                          |        | +      |                   |      |    |       |    |    |    |    |     |        |    |         |
| 2.476           | n-Butylethylenediamine                                           |        |        |                   |      | +  |       | +  |    |    |    |     |        |    |         |
| 2.5             | Phenol                                                           |        |        |                   |      |    |       |    |    |    | +  |     | +      |    | +       |
| 2.518           | 1-Propanol, 3-(methylthio)-                                      |        |        |                   |      |    |       |    |    |    |    |     |        | +  | +       |
| 2.482           | Propanedioic acid, propyl-                                       | +      |        |                   |      |    |       |    | +  |    |    |     |        |    |         |
| 2.848           | Glycerin                                                         |        |        |                   |      |    |       |    |    |    |    |     | +      |    |         |
| 3.018           | 1-Hexanol, 2-ethyl-                                              |        |        |                   |      |    |       |    |    | +  |    |     |        |    |         |
| 3.031           | Benzyl alcohol                                                   |        |        |                   |      |    |       |    |    | +  |    | +   |        |    |         |
| 3.191           | 2,5-Dimethyl-4-hydroxy-3(2H)-furanone                            |        |        |                   |      |    |       |    |    |    |    | +   |        |    |         |
| 3.628           | Pyrazine, 3-ethyl-2,5-dimethyl-                                  |        | +      |                   |      |    |       |    |    | +  |    |     |        |    |         |
| 3.84            | Cyclobutene, 2-propenylidene-                                    |        |        |                   |      |    |       |    |    |    |    |     | +      |    | +       |
| 3.864           | Benzeneethanamine                                                |        |        |                   |      |    |       | +  |    | +  |    |     |        |    | +       |
| 4.153           | Phenylethyl Alcohol                                              |        |        |                   | +    |    |       |    | +  | +  | +  | +   | +      | +  | +       |
| 4.602           | 4H-Pyran-4-one, 2,3-dihydro-3,5-dihydroxy-6-methyl-              | +      |        | +                 | +    | +  | +     | +  | +  | +  |    | +   | +      | +  |         |
| 4.926           | Hexanoic acid, 5-oxo-, ethyl ester                               |        | +      |                   |      |    |       |    |    | +  |    |     |        |    |         |
| 4.997           | Octanoic acid                                                    |        |        | +                 | +    | +  | +     | +  |    |    |    | +   |        |    | +       |
| 5.045           | Benzeneacetic acid, methyl ester                                 |        |        |                   |      |    |       |    |    |    |    |     | +      | +  | +       |
| 6.024           | Benzothiazole                                                    |        |        |                   |      |    |       |    |    |    | +  | +   | +      |    |         |
| 6.621           | Benzeneacetic acid                                               | +      |        |                   |      |    |       |    |    |    |    |     | +      | +  | +       |
| 6.638           | 1,1-Diisobutoxy-isobutane                                        |        |        |                   |      |    |       |    |    | +  |    |     |        |    |         |
| 6.768           | Butane, 1,1-dibutoxy-                                            |        | +      |                   |      |    |       |    | +  |    |    |     |        |    |         |
| 7.17            | 5-Thiazoleethanol, 4-methyl-                                     |        |        | +                 | +    | +  | +     | +  |    | +  | +  | +   |        |    |         |
| 7.418           | Indole                                                           |        |        |                   |      |    |       |    |    | +  |    | +   | +      | +  | +       |
| 7.618           | Propanedioic acid, phenyl-                                       |        |        |                   |      |    |       |    |    |    |    |     |        |    | +       |
| 7.79            | 1,2-Ethandiol, 1-phenyl-                                         |        |        |                   |      |    |       |    |    |    |    | +   |        |    |         |
| 7.79            | Formamide, N, N-dibutyl-                                         |        |        |                   | +    | +  |       | +  |    | +  | +  |     |        | +  |         |
| 8.652           | l-Leucine, N-methoxycarbonyl, methyl ester                       |        |        |                   |      |    | +     |    |    |    |    |     |        |    |         |
| 8.734           | Cyclohexasiloxane, dodecamethyl-                                 |        |        |                   |      |    |       |    |    | +  |    |     |        |    |         |
| 9.265           | Butanoic acid, butyl ester                                       | +      | +      | +                 | +    | +  | +     | +  |    | +  | +  |     |        | +  | +       |
| 9.289           | Propanoic acid, 2-methyl-, 3-hydroxy-2,4,4-trimethylpentyl ester |        |        |                   |      |    |       |    | +  | +  | +  |     | +      |    |         |
| 9.903           | 1-Tetradecene                                                    |        |        | +                 | +    |    |       | +  |    |    |    |     |        |    | +       |
| 9.372           | n-Decanoic acid                                                  |        |        |                   |      | +  |       |    |    |    |    | +   |        |    |         |
| 9.431           | Propanoic acid, 2-methyl-, butyl ester                           |        |        |                   |      |    |       | +  |    | +  |    |     |        |    |         |
| 9.85            | Benzeneethanol, alpha.-(phenylmethyl)-                           |        |        |                   |      |    |       |    |    |    |    |     | +      | +  | +       |

|               |                                                               |  |   |   |   |   |   |   |   |   |   |   |   |
|---------------|---------------------------------------------------------------|--|---|---|---|---|---|---|---|---|---|---|---|
| <b>9.915</b>  | 2-Tetradecene, (E)-                                           |  | + | + |   |   | + |   | + |   |   | + |   |
| <b>10.11</b>  | Tetradecane                                                   |  | + | + | + | + | + | + | + | + | + | + | + |
| <b>10.375</b> | Benzeneethanol, 4-hydroxy-                                    |  |   |   |   |   |   |   | + |   | + | + | + |
| <b>11.343</b> | Benzene, (2-isothiocyanatoethyl)-                             |  |   |   |   |   |   |   |   |   |   | + |   |
| <b>11.349</b> | Phthalimide                                                   |  | + | + | + | + | + | + | + | + | + | + | + |
| <b>11.452</b> | o-Cyanobenzoic acid                                           |  | + | + | + | + | + |   | + |   | + | + | + |
| <b>11.615</b> | Dodecane, 2-methyl-                                           |  |   |   |   |   | + | + |   |   |   |   |   |
| <b>11.798</b> | 7-Methyl-octadecane                                           |  |   |   |   |   | + |   |   |   |   |   |   |
| <b>11.957</b> | Acetic acid, phenyl-, isopentyl ester                         |  |   |   |   |   |   |   |   |   |   |   | + |
| <b>11.963</b> | Hexathiane                                                    |  |   |   |   |   |   |   | + |   | + |   | + |
| <b>12.264</b> | 3-Ethoxy-4-Methoxyphenol                                      |  |   |   |   |   |   |   |   |   | + |   |   |
| <b>12.294</b> | Cyclopentadecane                                              |  | + |   | + |   |   |   |   |   |   |   |   |
| <b>12.335</b> | Acetamide, N-(2-phenylethyl)-                                 |  |   |   |   |   |   |   |   |   | + |   | + |
| <b>12.489</b> | Pentadecane                                                   |  | + | + | + | + | + | + | + | + | + | + | + |
| <b>12.489</b> | Phenol, 3,5-bis(1,1-dimethylethyl)-                           |  |   |   |   |   |   |   |   |   |   |   | + |
| <b>12.654</b> | N-Butyryl-DL-homoserine lactone                               |  | + | + | + | + | + | + |   |   |   |   |   |
| <b>12.672</b> | Phenol, 2,4-bis(1,1-dimethylethyl)-                           |  | + | + | + |   |   |   | + | + | + |   | + |
| <b>12.678</b> | Phenol, 2,5-bis(1,1-dimethylethyl)-                           |  |   |   |   | + |   | + |   |   |   |   |   |
| <b>12.50</b>  | Phenol, 2,6-bis(1,1-dimethylethyl)-                           |  |   |   |   |   |   |   |   |   |   | + |   |
| <b>13.929</b> | Pentadecane, 2-methyl-                                        |  | + |   |   |   | + |   |   |   |   |   |   |
| <b>14.036</b> | Dodecanoic acid                                               |  |   |   |   |   | + |   | + |   |   | + | + |
| <b>14.088</b> | Pentadecane, 3-methyl-                                        |  | + |   | + |   | + |   |   |   |   |   |   |
| <b>14.437</b> | 2,6,10,14-Tetramethyl-7-(3-methylpent-4-enylidene)pentadecane |  | + |   |   |   |   |   |   |   |   |   |   |
| <b>14.579</b> | Cetene                                                        |  | + | + |   | + | + |   |   |   | + |   | + |
| <b>14.59</b>  | 5-Octadecene, (E)-                                            |  |   |   | + |   |   |   |   |   |   |   |   |
| <b>14.602</b> | Z-8-Hexadecene                                                |  |   |   | + | + |   | + |   |   |   | + |   |
| <b>14.762</b> | Hexadecane                                                    |  | + | + | + | + | + | + | + | + | + | + | + |
| <b>14.885</b> | Cyclopropane, 1-methyl-1-(1-methylethyl)-2-nonyl-             |  | + |   |   |   |   |   |   |   |   |   |   |
| <b>14.938</b> | Indole-3-pyruvic acid                                         |  |   |   |   |   |   |   |   |   | + |   | + |
| <b>14.962</b> | Tryptophol                                                    |  |   |   |   |   |   |   |   |   | + |   | + |
| <b>14.974</b> | 1H-Indole-3-acetic acid, hydrazide                            |  |   |   |   |   |   |   |   |   | + |   | + |
| <b>15.688</b> | 7,9-Dimethyl-1,4-dioxo-7,9-diazacycloundecane-8-thione        |  |   |   |   |   |   |   |   |   | + |   |   |
| <b>15.741</b> | Methyl jasmonate                                              |  |   |   |   |   |   |   |   |   |   |   | + |
| <b>15.801</b> | Heptadecane, 3-methyl-                                        |  |   |   |   |   |   |   |   |   |   |   | + |
| <b>15.853</b> | 2-Bromo dodecane                                              |  | + |   |   |   |   |   |   |   |   |   |   |
| <b>15.883</b> | Hexadecane, 7,9-dimethyl-                                     |  |   |   |   |   |   |   |   |   |   |   | + |
| <b>16.078</b> | 2-Mercaptophenol                                              |  |   |   |   |   |   |   |   |   | + |   | + |
| <b>16.137</b> | Phenol, 2-[(1-methylethyl) thio]-                             |  |   |   |   |   |   |   |   |   | + |   |   |
| <b>16.166</b> | Hexadecane, 2-methyl-                                         |  | + |   | + |   | + |   |   |   |   |   |   |
| <b>16.208</b> | 1-Pentadecene                                                 |  |   |   |   |   |   |   |   |   |   |   | + |
| <b>16.515</b> | 4-Mercaptophenol                                              |  | + |   |   |   |   |   |   |   |   |   | + |
| <b>16.769</b> | Dodecane, 2,6,11-trimethyl-                                   |  |   |   |   |   |   |   |   |   |   |   | + |
| <b>16.969</b> | Heptadecane                                                   |  | + | + | + | + | + | + | + | + | + | + | + |
| <b>17.005</b> | Nonadecane, 9-methyl-                                         |  |   |   |   |   | + |   |   |   |   |   |   |
| <b>17.105</b> | Heptadecane, 2,6-dimethyl-                                    |  | + |   |   |   |   |   |   |   | + |   |   |



|        |                                                                            |   |   |   |   |   |   |   |   |   |   |   |   |   |
|--------|----------------------------------------------------------------------------|---|---|---|---|---|---|---|---|---|---|---|---|---|
| 21.35  | L-Proline, N-valeryl-, decyl ester                                         |   |   |   |   |   |   |   |   | + |   |   | + |   |
| 21.349 | Pentadecanoic acid, 13-methyl-, methyl ester                               |   |   |   |   |   |   |   |   |   |   |   |   | + |
| 21.503 | Pyrrolo[1,2-a] pyrazine-1,4-dione, hexahydro-3-(2-methylpropyl)-           | + | + | + | + | + | + | + | + | + | + | + | + | + |
| 21.55  | Hexadecanoic acid, methyl ester                                            |   |   |   |   |   |   |   |   |   |   |   | + | + |
| 21.751 | 2,5-Furandione, 3-dodecyl-                                                 |   |   |   |   |   |   |   |   |   |   |   | + |   |
| 21.804 | Benzenepropanoic acid, 3,5-bis(1,1-dimethylethyl)-4-hydroxy-, methyl ester | + |   |   | + | + | + | + | + | + | + | + | + | + |
| 21.969 | Stannane, tetraethyl-                                                      |   |   |   |   |   |   |   |   |   |   |   | + |   |
| 22.005 | 2',4'-Dihydroxyacetophenone oxime                                          |   |   |   |   |   |   |   |   |   |   |   |   | + |
| 22.146 | 1,2-Benzenedicarboxylic acid, butyl 2-methylpropyl ester                   |   |   |   |   |   |   |   |   |   |   |   | + |   |
| 22.147 | 2-Mercaptobenzothiazole                                                    |   |   |   |   |   |   |   |   |   |   |   | + | + |
| 22.158 | 1,2-Benzenedicarboxylic acid, bis(2-methylpropyl) ester                    |   |   |   |   |   |   |   |   |   |   |   | + |   |
| 22.182 | Diethyl Phthalate                                                          |   |   |   |   |   |   |   |   |   |   |   | + | + |
| 22.701 | E-15-Heptadecenal                                                          |   |   |   |   |   |   |   |   |   |   |   | + | + |
| 22.731 | 3-Phenylbicyclo (3.2.2) nona-3,6-dien-2-one                                |   |   |   |   |   |   |   |   |   |   |   | + |   |
| 22.778 | Cyclohexane, 1-(1,5-dimethylhexyl)-4-(4-methylpentyl)-                     |   |   |   |   |   |   |   |   |   |   |   | + |   |
| 22.885 | Cyclohexadecane, 1,2-diethyl-                                              | + | + |   |   |   |   |   |   |   |   |   | + |   |
| 23.009 | Eicosane                                                                   | + | + | + | + | + | + | + | + | + | + | + | + | + |
| 23.032 | Octadecane, 1-chloro-                                                      |   |   |   |   |   |   |   |   |   |   |   | + | + |
| 23.144 | Cyclic octaatomic sulfur                                                   |   |   |   |   |   |   |   |   |   |   |   | + | + |
| 24.03  | E-11-Methyl-12-tetradecen-1-ol acetate                                     |   |   |   |   |   |   |   |   |   |   |   | + | + |
| 24.26  | Fluorene, 4-[1,2-dihydroxyethyl]-                                          |   |   |   |   |   |   |   |   |   |   |   | + |   |
| 24.419 | Oleanitrile                                                                | + | + | + | + | + | + | + | + | + | + | + | + | + |
| 24.496 | 2-Benzimidazolethiol                                                       |   |   |   |   |   |   |   |   |   |   |   | + |   |
| 24.65  | 2-Methyl-E-7-octadecene                                                    |   |   |   |   |   |   |   |   |   |   |   | + | + |
| 24.85  | Heptadecanenitrile                                                         |   |   |   |   |   |   |   |   |   |   |   | + |   |
| 24.886 | 1-Eicosene                                                                 |   |   |   |   |   |   |   |   |   |   |   | + |   |
| 24.886 | Nonadecanenitrile                                                          |   |   |   |   |   |   |   |   |   |   |   | + |   |
| 24.891 | Octadecanenitrile                                                          |   |   |   |   |   |   |   |   |   |   |   | + | + |
| 24.992 | DL-Tryptophan, N-acetyl-                                                   |   |   |   |   |   |   |   |   |   |   |   | + | + |
| 25.104 | Indole-3-butyramide                                                        |   |   |   |   |   |   |   |   |   |   |   | + |   |
| 25.328 | Heptadecanoic acid, 16-methyl-, methyl ester                               |   |   |   |   |   |   |   |   |   |   |   | + |   |
| 25.329 | Heptadecanoic acid, 14-methyl-, methyl ester                               |   |   |   |   |   |   |   |   |   |   |   | + |   |
| 25.411 | 2,5-Piperazinedione, 3-methyl-6-(phenylmethyl)-                            | + | + |   |   |   |   |   |   |   |   |   | + | + |
| 25.777 | Alloaromadendrene                                                          |   |   |   |   |   |   |   |   |   |   |   | + |   |
| 25.813 | 2,5-Piperazinedione, 3-(phenylmethyl)-                                     | + | + |   |   |   |   |   |   |   |   |   | + |   |
| 25.854 | Androstenedione                                                            |   |   |   |   |   |   |   |   |   |   |   | + |   |
| 26.32  | Z-5-Nonadecene                                                             |   |   |   |   |   |   |   |   |   |   |   | + | + |





**Table S3.** Secondary metabolites predicted from *P. temperata temperata*, *Xenorhabdus hominickii*, and *X. ehlersii*

| Compounds (Acronym)                       | Structure                                                                            |
|-------------------------------------------|--------------------------------------------------------------------------------------|
| Benzyl alcohol (BA)                       | 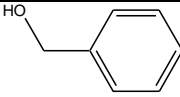   |
| Indole (IND)                              |    |
| Benzeneethanol, 4-hydroxy- (BH)           |    |
| o-Cyanobenzoic acid (CBA)                 |    |
| Acetamide, N-(2-phenylethyl)- (NPA)       |  |
| Tryptophol (TPL)                          |  |
| 1H-Indole-3-acetic acid, hydrazide (IAAH) |  |
| 2-Mercaptophenol (MP)                     |  |
| 2-Mercaptobenzothiazole (MT)              |  |

|                                                    |                                                                                    |
|----------------------------------------------------|------------------------------------------------------------------------------------|
| <p>1-Hexanol, 2-ethyl- (EH)</p>                    | 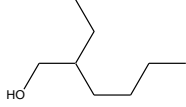 |
| <p>3-Ethoxy-4-Methoxyphenol (EMP)</p>              |  |
| <p>2,5-Dimethyl-4-hydroxy-3(2H)-furanone (DHF)</p> |  |
| <p>1,2-Ethanediol, 1-phenyl- (PE)</p>              |  |

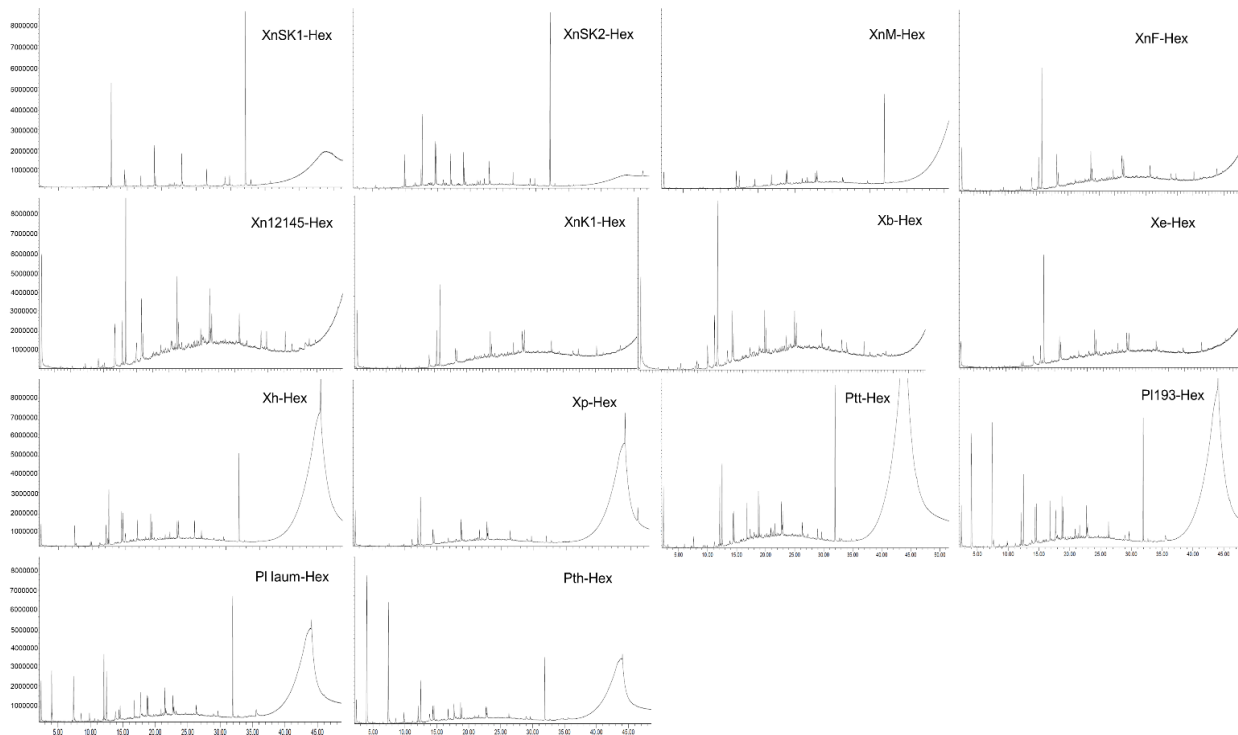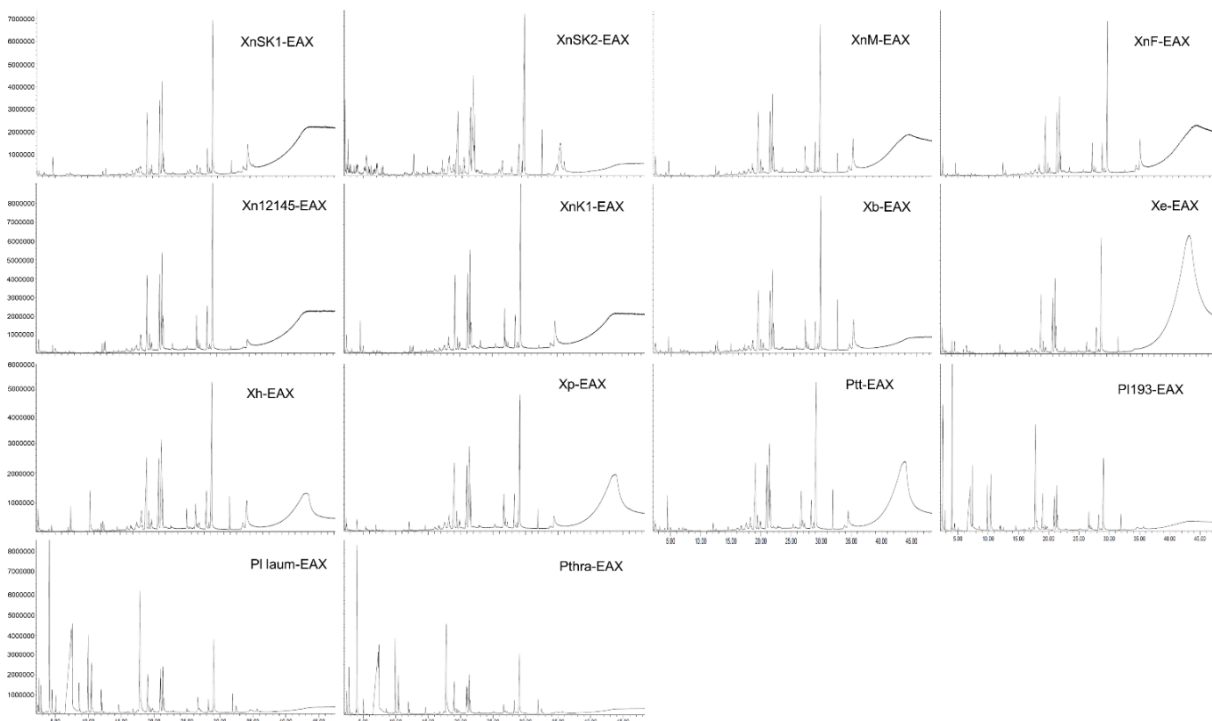

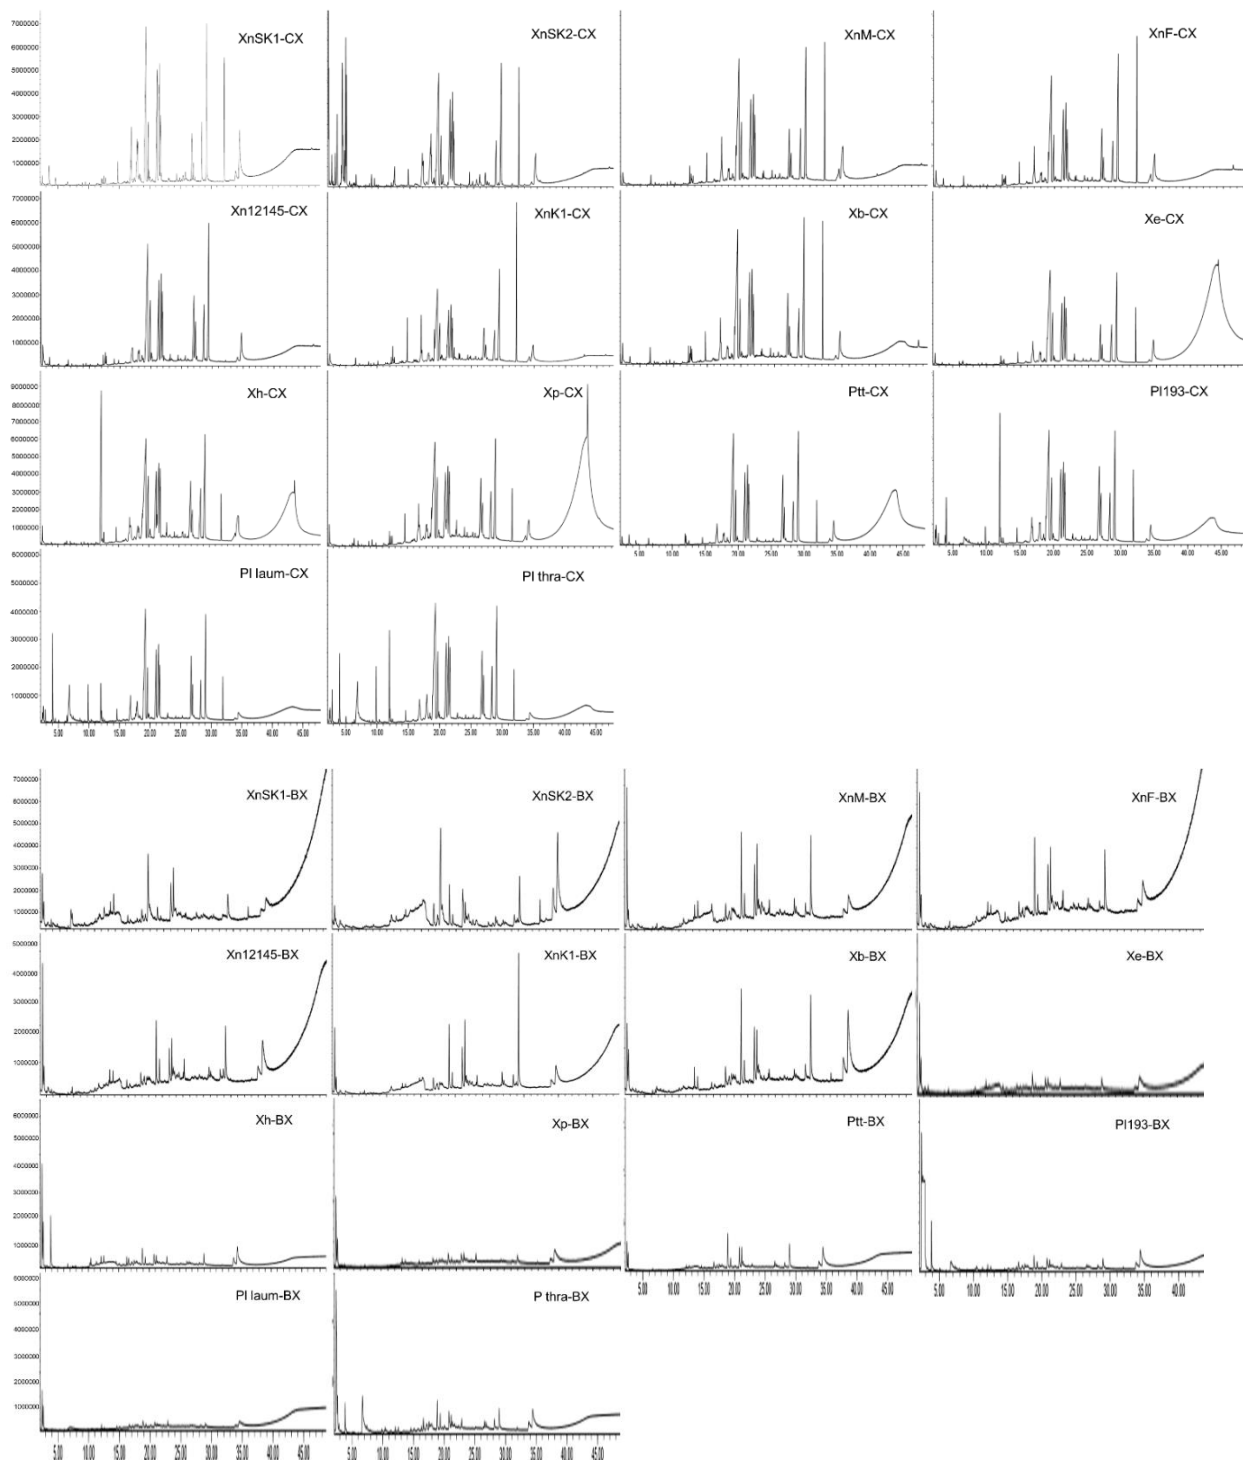

Fig. S1
